# Supplementary material for: Increased Prevalence of Headaches and Migraine in Patients with Psoriatic Arthritis and Axial Spondyloarthritis: Insights from an Italian Cohort Study
Source: MDPI journal article supplement (doi:10.3390/biomedicines12020371), 2024-02-05
Supplement: s1 [file s1]

# Increased prevalence of headaches and migraine in patients with Psoriatic Arthritis and Axial Spondyloarthritis: Insights from an Italian Cohort Study

Supplementary Material

**Table S1.** Comparison PsA and healthy controls

|                               | Entire PsA Population<br>(216) | Healty controls (87) | p    |
|-------------------------------|--------------------------------|----------------------|------|
| Age (years)                   | 57 (49-63)                     | 56 (43-68)           | 0.9  |
| Gender                        | 34.26% m<br>75.66% f           | 36.78% m<br>63.22% f | 0.7  |
| BMI                           | 26.5 (23.7-29.9)               | 26.0 (24-27.8)       | 0.09 |
| Charlson Comorbidity<br>Index | 2 (1-3)                        | 2 (0-3)              | 0.8  |

**Table S2.** Comparison axSpA and healthy controls

|                               | axSpA Population 70<br>(100%) | Healty controls (87) | p   |
|-------------------------------|-------------------------------|----------------------|-----|
| Age (years)                   | 57 (48-66)                    | 56 (43-68)           | 0.9 |
| Gender                        | 42.86% m<br>57.14% f          | 36.78% m<br>63.22% f | 0.4 |
| BMI                           | 25.76 (23.8- 28.05)           | 26.0 (24-27.8)       | 0.7 |
| Charlson<br>Comorbidity Index | 2 (1-3)                       | 2 (0-3)              | 0.3 |
